# Supplementary material for: Neoadjuvant tislelizumab plus stereotactic body radiotherapy and adjuvant tislelizumab in early-stage resectable hepatocellular carcinoma: the Notable-HCC phase 1b trial
Source: PubMed Central journal article supplement (PMC11021407; doi:10.1038/s41467-024-47420-3), 2024-04-16
Supplement: 41467_2024_47420_MOESM3_ESM.pdf [file 41467_2024_47420_MOESM3_ESM.pdf]

## **Description of Additional Supplementary Files**

Supplementary Movie 1: The Elekta Unity MRI-linac system enables visualization of all anatomical changes during the course of radiotherapy.
